# Supplementary material for: YAP1 inhibits the senescence of alveolar epithelial cells by targeting Prdx3 to alleviate pulmonary fibrosis
Source: PubMed Central journal article supplement (PMC11297023; doi:10.1038/s12276-024-01277-0), 2024-07-01
Supplement: 12276_2024_1277_MOESM1_ESM.pdf [file 12276_2024_1277_MOESM1_ESM.pdf]

## Supplementary Materials

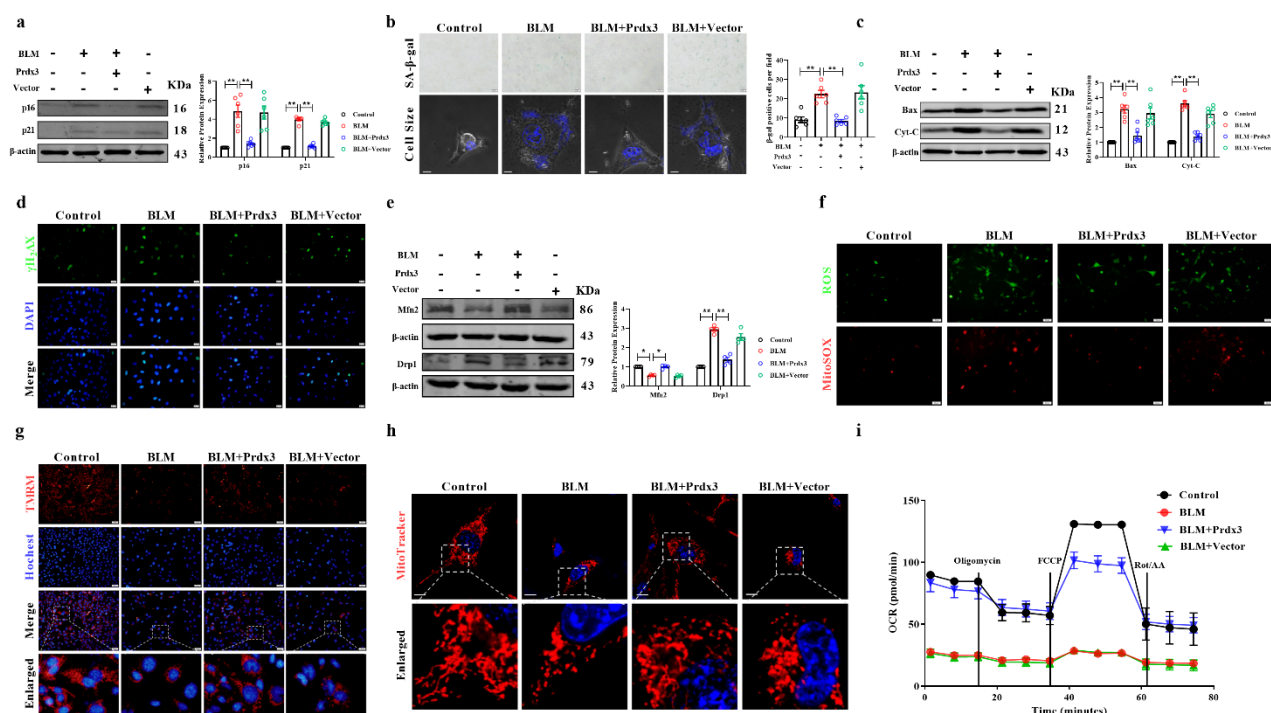

**Supplementary Fig. 1 Overexpression of Prdx3 inhibits BLM-induced senescence and mitochondrial dysfunction.**

(a) Western blot results of protein expression of p16 and p21 in MLE-12 cells transfected with Prdx3 after BLM treatment,  $n=6$ . (b) SA- $\beta$ -gal staining for cellular senescence of MLE-12 cells transfected with Prdx3 after BLM treatment,  $n=6$ . Scale bars, 50  $\mu$ m. The cell size was determined by confocal microscopy; nuclei were stained with Hoechst 33342 (blue). Scale bars: 10  $\mu$ m. (c) Western blot results of protein expression of Bax and Cyt-C in MLE-12 cells transfected with Prdx3 after BLM treatment,  $n=6$ . (d) Immunofluorescence staining assay of  $\gamma$ H<sub>2</sub>AX in MLE-12 cells treated with Prdx3 plasmid. Scale bars: 20  $\mu$ m. (e) The protein level of Drp1, and Mfn2 was determined by western blot,  $n=4$ . (f) Cytosolic and mitochondrial ROS in Prdx3 over-expressing MLE-12 cells after BLM administration was assessed by DCFH-DA probe and MitoSOX. Scale bars: 50  $\mu$ m. (g) Representative images obtained from MLE-12 cells stained with TMRM (red) and Hoechst 33342 for nuclei (blue). Scale bars: 50  $\mu$ m. (h) Representative images acquired by confocal microscopy showing the morphological change of mitochondria. Scale bars: 10  $\mu$ m. (i) O<sub>2</sub> consumption rate was assessed using a seahorse mitochondrial stress test assay. Data are presented as the mean  $\pm$  SEM. \*\*  $P < 0.01$  (Ordinary one-way ANOVA).

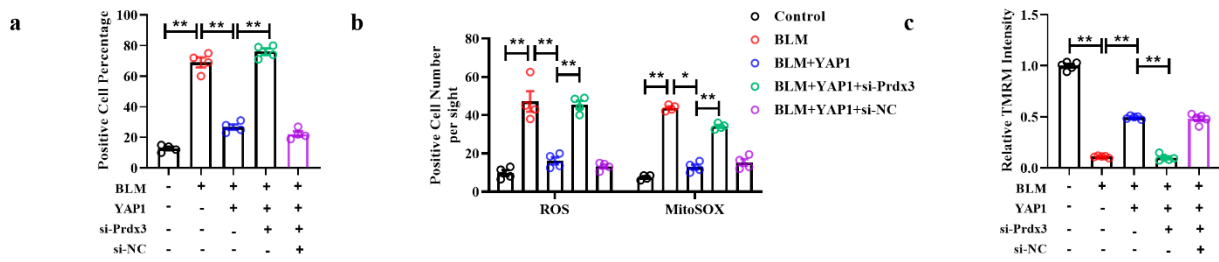

**Supplementary Fig. 2 Silencing Prdx3 restores cellular senescence and mitochondrial dysfunction inhibited by YAP1.**

(a) Statistics of  $\gamma$ H<sub>2</sub>AX in MLE-12 cells treated with YAP1 or silencing Prdx3 following BLM induction. *n*=4. (b) Statistics of ROS and MitoSOX in Prdx3 over-expressing MLE-12 cells after BLM administration. *n*=4. (c) Statistics of MLE-12 cells stained with TMRM. *n*=5. \**P* < 0.05, \*\**P* < 0.01.
